# Supplementary material for: Clinical Outcome of Nivolumab Plus Ipilimumab in Patients with Locally Advanced Non-Small-Cell Lung Cancer with Relapse after Concurrent Chemoradiotherapy followed by Durvalumab
Source: MDPI journal article supplement (doi:10.3390/cancers16071409), 2024-04-03
Supplement: s1 [file s1]

Supplementary Table S2. Adverse events with durvalumab consolidation

| Variable                | All grade<br>n, (%) | ≥ grade 3<br>n, (%) |
|-------------------------|---------------------|---------------------|
| Hyper or hypothyroidism | 4 (13.3)            | 0                   |
| Pneumonitis             | 18 (60)             | 3 (10)              |
| Liver dysfunction       | 1 (3.3)             | 0                   |
| Skin disorder           | 4 (13.3)            | 0                   |
| Arthralgia              | 3 (10)              | 0                   |
| Eosinophilia            | 2 (6.7)             | 0                   |
| Creatinine elevation    | 1 (3.3)             | 0                   |
