# Supplementary material for: Clinical Outcome of Nivolumab Plus Ipilimumab in Patients with Locally Advanced Non-Small-Cell Lung Cancer with Relapse after Concurrent Chemoradiotherapy followed by Durvalumab
Source: MDPI journal article supplement (doi:10.3390/cancers16071409), 2024-04-03
Supplement: s1 [file s1]

Supplementary Table S3. Comparison of adverse events with durvalumab and nivolumab plus ipilimumab

| Number of patients | Durvalumab        |       | Nivolumab plus ipilimumab |       |
|--------------------|-------------------|-------|---------------------------|-------|
|                    | Adverse event     | Grade | Adverse event             | Grade |
| 1                  | Arthralgia        | 2     | Arthralgia                | 2     |
|                    | Pneumonitis       | 2     | -                         |       |
| 2                  | Pneumonitis       | 2     | -                         |       |
| 3                  | -                 |       | Liver dysfunction         | 1     |
| 4                  | Pneumonitis       | 1     | Skin disorder             | 2     |
| 5                  | Eosinophilia      | 1     | Pneumonitis               | 3     |
|                    | -                 |       | Liver dysfunction         | 2     |
| 6                  | Liver dysfunction | 2     | Liver dysfunction         | 1     |
|                    | Pneumonitis       | 1     | -                         |       |
| 7                  | Pneumonitis       | 2     | Hypothyroidism            | 2     |
| 8                  | Pneumonitis       | 2     | Hypothyroidism            | 1     |
|                    | -                 |       | Skin disorder             | 3     |
|                    | -                 |       | Diarrhea                  | 2     |
| 9                  | Pneumonitis       | 3     | Liver dysfunction         | 1     |
| 10                 | Skin disorder     | 1     | Arthralgia                | 1     |
|                    | -                 |       | $\gamma$ -GTP increased   | 1     |
|                    | -                 |       | ALP increased             | 1     |
| 11                 | -                 |       | Diarrhea                  | 1     |
| 12                 | Pneumonitis       | 2     | Pneumonitis               | 1     |
|                    | -                 |       | Liver dysfunction         | 1     |
| 13                 | Pneumonitis       | 2     | -                         |       |
| 14                 | Skin disorder     | 1     | Skin disorder             | 2     |
|                    | Pneumonitis       | 1     | Hypothyroidism            | 1     |
| 15                 | Pneumonitis       | 1     | Liver dysfunction         | 1     |
|                    | Eosinophilia      | 1     | -                         |       |
| 16                 | Arthralgia        | 2     | Arthralgia                | 1     |
|                    | Pneumonitis       | 2     | Diarrhea                  | 3     |
|                    | -                 |       | Skin disorder             | 1     |
| 17                 | Pneumonitis       | 1     | -                         |       |
| 18                 | Pneumonitis       | 3     | -                         |       |

|    |                 |   |                |   |
|----|-----------------|---|----------------|---|
| 19 | Hypothyroidism  | 2 | Hypothyroidism | 2 |
| 20 | Hypothyroidism  | 1 | -              |   |
| 21 | -               |   | -              |   |
| 22 | -               |   | Skin disorder  | 1 |
| 23 | Hypothyroidism  | 2 | Hypothyroidism | 2 |
|    | Skin disorder   | 1 | Arthralgia     | 2 |
| 24 | Pneumonitis     | 3 | -              |   |
| 25 | Arthralgia      | 1 | -              |   |
| 26 | Hyperthyroidism | 1 | Skin disorder  | 2 |
| 27 | Cr elevation    | 1 | Stomatitis     | 1 |
|    | -               |   | Shingles       | 2 |
|    | -               |   | Eosinophilia   | 1 |
| 28 | Pneumonitis     | 1 | Pneumonitis    | 2 |
| 29 | Pneumonitis     | 1 | -              |   |
|    | Skin disorder   | 1 | -              |   |
| 30 | Pneumonitis     | 1 | -              |   |

γ-GTP, γ-Glutamyl transpeptidase; ALP, alkaline phosphatase. Cr, creatinine
