# Supplementary material for: Clinical Outcome of Nivolumab Plus Ipilimumab in Patients with Locally Advanced Non-Small-Cell Lung Cancer with Relapse after Concurrent Chemoradiotherapy followed by Durvalumab
Source: MDPI journal article supplement (doi:10.3390/cancers16071409), 2024-04-03
Supplement: s1 [file s1]

Supplementary Table S1. Therapeutic profiles of CCRT followed by durvalumab consolidation

| Chemoradiotherapy phase                               |                                 | n, (%)        |
|-------------------------------------------------------|---------------------------------|---------------|
| Radiotherapy                                          | Median total radiation, (range) | 60 Gy (45-60) |
|                                                       | Median total fraction, (range)  | 30 Fr (15-30) |
| Chemotherapy regimen                                  | Weekly CBDCA+PTX                | 12 (40)       |
|                                                       | Low dose CBDCA                  | 7 (23.3)      |
|                                                       | CDDP+DTX                        | 3 (10)        |
|                                                       | CBDCA+PTX                       | 3 (10)        |
|                                                       | CDDP+S-1                        | 3 (10)        |
|                                                       | CDDP+PEM                        | 1 (3.3)       |
|                                                       | CDDP+ETP                        | 1 (3.3)       |
| Durvalumab consolidation phase                        |                                 |               |
| Completion or withdrawal of durvalumab administration | Completion of durvalumab        | 10 (33.3)     |
|                                                       | Discontinuation due to AEs      | 3 (10)        |
|                                                       | Discontinuation due to PD       | 16 (19.7)     |
|                                                       | Others                          | 1 (3.3)       |

CCRT, concurrent chemoradiotherapy; Gy, gray; Fr, fractions; CBDCA, carboplatin; PTX, paclitaxel; CDDP, cisplatin; DTX, docetaxel; PEM, pemetrexed; ETP, etoposide; AE, adverse event; PD, progressive disease.
